# Supplementary material for: Dengue Virus Serotype 2 Intrahost Diversity in Patients with Different Clinical Outcomes
Source: Viruses. 2021 Feb 23;13(2):349. doi: 10.3390/v13020349 (PMC7926750; doi:10.3390/v13020349)
Supplement: Supplementary file 1 [file viruses-13-00349-s001.xlsx]

## Sheet: Appendix S1 
Supplementary Appendix 1 - Statistical correlations between patient's clinical outcome and immune response or days of symptoms.
Clinical classification	Immune response	Days of Symptoms		Clinical classification vs. Immune response (Primary/Secondary)	Clinical classification vs. Days of Symptoms
1	2	0	Pearson r correlation
1	1	3	r	-0.1602	0.5367
1	1	2	95% confidence interval	-0,384 to 0,08133	0,3369 to 0,6903
1	2	2	R squared	0.02566	0.2881
1	1	1
1	1	3	P value
1	2	2	P (two-tailed)	0.1919	<0,0001
1	1	2	P value summary	ns	****
1	1	1	Significant? (alpha = 0.05)	No	Yes
1	1	1
1	1	2	Number of XY Pairs	68	65
1	2	4
1	1	3
1	2	1
1	1	4
1	1	4
1	1	0
1	1	2
1	2	2
1	1	2
1	1	1
1	1	0
1	2	5
1	1	5
1	2	3
1	2	2
1	2	2
1	2	2
1	2	2
1	2	1
1	2	3
2	2	2
2	1	3
2	2	3
2	1	2
2	1	1
2	2	2
2	2	0
2	2	2
2	1	3
2	2	5
2	2	1
2	2	5
2	1	2
2	2	2
2	2	1
2	1	12
2	1	3
2	2	3
3	1	24
3	1	6
3	1	4
3	1	4
3	1	5
3	1	6
3	1	7
3	2	7
3	2	4
3	2	4
3	1	5
3	1	8
3	1	9
3	1	5
3	1	10
3	1	5
2	1	ND
3	2	ND
3	1	ND
Notes:
Clinical classification
1= Dengue fever
2= Dengue with warning signs
3= Severe dengue
Immune response
1= Primary
2= Secondary

## Sheet: Table S2
Supplementary Table 2 - Clinical, epidemiological and sequencing samples' characteristics. DF: dengue fever; WS: dengue with warning signs; SD: severe dengue; M: male; F: female; RJ: state of Rio de Janeiro; SP: state of São Paulo; MG: state of Minas Gerais; VL: viral load; pfu: plaque formation unit; P: primary infection; S: secondary infection; ND: information not determined; iSNV: intrahost si…
Sample	Collection_date	Location	DofS	Immune response	Clinical classification	Observation	Gender	Age	Viral Load (pfu/ul)	SRA Accession #	Consensus sequence Accession n#	Sequencing platform	Total sequencing reads (n)	Reads length (nt) after trimming+filtering	Min Bases Quality Scores (Phred +33) after trimming+filtering	% DENV2 specific reads	Assembly	Mapping reads after removing duplicates (%)	Genome Coverage (%)	Average depth (x)	# iSNV/LVs after filtering
137	2007-08-27	RJ/Rio de Janeiro	9	P	SD	Decease	F	50	8.81	SAMN11586259	MN589858	Nextseq500	15772886	30-38	>30	433428	De novo	167393 (1.06)	99.8788	621.05	130
138	2007-11-22	RJ/Nova Iguaçu	2	P	WS	-	M	8	10100	SAMN11586260	MN589859	Nextseq500	27131548	30-38	>30	139696	De novo	94978 (0.35)	99.7389	562.18	81
139	2007-12-20	RJ/Rio de Janeiro	5	P	SD	-	F	8	34.2	SAMN11586261	MN589860	Nextseq500	16123670	30-38	>30	18224	De novo	9486 (0.06)	99.7575	318.2	71
140	2008-03-17	RJ/Rio de Janeiro	10	P	SD	Decease	F	75	361	SAMN11586262	MN589861	Nextseq500	90147034	30-38	>30	939709	De novo	371634 (0.41)	99.9627	32.29	3
141	2008-03-13	RJ/Rio de Janeiro	5	S	DF	-	F	10	11600	SAMN11586263	MN589862	Nextseq500	65074044	30-38	>30	577370	De novo	185095 (0.28)	99.8601	1254.46	301
142	2008-04-30	RJ/Rio de Janeiro	5	P	DF	-	M	10	1610	SAMN11586264	MN589863	Nextseq500	19833998	30-38	>30	79542	De novo	31450 (0.16)	99.5803	106.22	11
143	2008-03-17	RJ/Rio de Janeiro	ND	S	SD	Decease	F	14	281	SAMN11586265	MN589864	Nextseq500	14534780	30-38	>30	8021	De novo	5373 (0.04)	99.543	18.52	11
144	2008-04-07	RJ/Rio de Janeiro	ND	P	WS	Decease	M	85	760	SAMN11586266	MN589865	Nextseq500	20879494	30-38	>30	88968	De novo	30821 (0.15)	99.7575	103.97	8
145	2009-12-23	RJ/Campos dos Goytacazes	3	S	DF	-	F	29	247	SAMN11586267	MN589866	Nextseq500	21399866	30-38	>30	560765	De novo	174922 (0.82)	99.9254	509.05	72
146	2010-04-29	RJ/Rio de Janeiro	2	S	DF	-	F	50	229000	SAMN11586268	MN589867	Nextseq500	20844826	15-38	>32	1499384	De novo	1014846 (4.87)	100	3484.79	15
147	2010-03-09	RJ/Campos dos Goytacazes	2	S	WS	-	F	62	1730	SAMN11586269	MN589868	Nextseq500	39112700	30-38	>32	1499330	De novo	817394 (2.09)	99.944	2809.06	7
148	2010-03-09	RJ/Campos dos Goytacazes	1	S	WS	-	F	17	106	SAMN11586270	MN589869	Nextseq500	50487294	30-38	>30	848726	De novo	171786 (0.34)	99.944	576.4	98
149	2010-07-01	RJ/Campos dos Goytacazes	5	P	SD	Decease	F	5	494000	SAMN11586271	MN589870	Nextseq500	30491666	10-38	>30	1499519	De novo	1134330 (3.72)	100	3884.66	15
151	2010-03-09	RJ/Campos dos Goytacazes	2	S	DF	-	M	41	3820	SAMN11586272	MN589871	Nextseq500	17411510	30-38	>30	565107	De novo	188120 (1.08)	99.8601	634.88	99
153	2011-02-16	RJ/Campos dos Goytacazes	12	P	WS	-	F	45	106	SAMN11586273	MN589872	Nextseq500	13627456	30-38	>30	227910	De novo	93675 (0.69)	99.9254	314.76	44
154	2011-05-18	RJ/Campos dos Goytacazes	2	S	DF	-	M	21	156000	SAMN11586274	MN589873	Nextseq500	39170300	12-38	>30	1499580	De novo	1033644 (2.64)	99.95	3565.39	15
155	2011-04-12	RJ/Niteroi	2	S	DF	-	M	54	166000	SAMN11586275	MN589874	Nextseq500	19430178	30-38	>32	1449356	De novo	854498 (4.40)	99.8788	2950.21	10
156	2011-04-12	RJ/Niteroi	3	P	WS	-	F	8	4.68	SAMN11586276	MN589875	Nextseq500	31177520	30-38	>30	11037	De novo	4557 (0.01)	99.6643	15.51	39
157	2011-04-20	RJ/Niteroi	3	S	WS	-	M	28	159	SAMN11586277	MN589876	Nextseq500	23385758	30-38	>30	5399	De novo	2555 (0.01)	99.3752	8.75	4
158	2011-05-04	RJ/Campos dos Goytacazes	1	S	DF	-	M	63	33800	SAMN11586278	MN589877	Nextseq500	31661364	30-38	>32	780541	De novo	378903 (1.20)	99.8694	1309.22	15
159	2011-05-04	RJ/Campos dos Goytacazes	3	S	DF	-	M	36	7040	SAMN11586279	MN589878	Nextseq500	14666016	30-38	>30	362219	De novo	143364 (0.98)	99.8508	482.29	60
160	2019-04-28	MG/Belo Horizonte	0	S	DF	Pregnant	F	24	67100	SAMN17302227	MW577809	HiSeq4000	7045836	20-150	>27	54464	De novo	31056 (0.44)	98.7783	227.23	212
161	2019-05-08	MG/Belo Horizonte	3	P	DF	-	F	28	12500	SAMN17302228	MW577810	HiSeq4000	9372204	20-150	>28	25474	De novo	15076 (0.16)	99.3192	102.19	211
162	2019-05-02	MG/Luz	2	P	DF	-	M	44	43100	SAMN17302229	MW577811	HiSeq4000	5563880	20-150	>29	64090	De novo	36958 (0.66)	99.9627	248.53	154
163	2019-05-02	MG/Belo Horizonte	2	S	DF	Pregnant	F	28	86400	SAMN17302230	MW577812	HiSeq4000	7324996	20-150	>30	95798	De novo	54568 (0.74)	99.8415	372.25	113
166	2019-04-04	MG/Sete Lagoas	1	P	DF	-	M	65	528090	SAMN17302231	MW577813	HiSeq4000	8530895	20-150	>31	7136039	De novo	889409 (10.4)	100	5905.15	153
167	2019-04-04	MG/Tres Pontas	3	P	DF	-	F	51	478871	SAMN17302232	MW577814	HiSeq4000	5194752	20-150	>30	101784	De novo	57159 (1.10)	99.8228	325.3	246
168	2019-04-26	MG/Bom Despacho	2	S	DF	-	M	53	277891	SAMN17302233	MW577815	HiSeq4000	7692344	20-150	>31	1786647	De novo	394621 (5.13)	100	2416.51	230
169	2019-04-26	MG/Belo Horizonte	2	P	DF	Pregnant	F	30	231318	SAMN17302234	MW577816	HiSeq4000	7068068	20-150	>31	543673	De novo	2532813 (35.8)	100	3916.72	88
170	2019-04-26	MG/Belo Horizonte	1	P	DF	Pregnant	F	26	51712.9	SAMN17302235	MW577817	HiSeq4000	6658910	20-150	>31	1067021	De novo	331851 (4.98)	100	2233.31	82
171	2019-05-08	MG/Sete Lagoas	1	P	DF	-	F	49	1.35414e+06	SAMN17302236	MW577818	HiSeq4000	5399200	20-150	>31	1261964	De novo	334584 (6.20)	100	2117.73	69
172	2019-04-09	MG/Araxa	2	P	DF	-	F	65	8.37559e+06	SAMN17302237	MW577819	HiSeq4000	12588952	20-150	>31	8820723	De novo	894187 (7.10)	100	4997.89	86
173	2019-01-29	RJ/Vassouras	4	S	DF	-	M	42	28191.8	SAMN17302238	MW577820	HiSeq4000	5296562	20-150	>31	638378	De novo	251823 (4.75)	99.972	2241.65	70
174	2019-02-22	RJ/Volta Redonda	3	P	DF	-	M	59	26851.9	SAMN17302239	MW577821	HiSeq4000	5859648	20-150	>31	600331	De novo	246176 (4.20)	100	2052.81	82
175	2019-03-11	RJ/Volta Redonda	1	S	DF	-	M	37	947.842	SAMN17302240	MW577822	HiSeq4000	5120508	20-150	>31	1247003	De novo	393332 (7.68)	100	3219.11	70
177	2019-05-20	RJ/Volta Redonda	4	P	DF	-	M	40	31841.7	SAMN17302241	MW577823	HiSeq4000	5922164	20-150	>31	1107735	De novo	371051 (6.27)	100	3159.28	82
178	2019-05-20	RJ/Volta Redonda	4	P	DF	-	M	36	49758	SAMN17302242	MW577824	HiSeq4000	4965494	20-150	>31	865866	De novo	324172 (6.53)	100	2651.99	57
179	2019-05-22	RJ/Vassouras	0	P	DF	-	F	44	33977.8	SAMN17302243	MW577825	HiSeq4000	9098732	20-150	>31	502267	De novo	230491 (2.53)	99.9907	1873.16	109
180	2019-06-03	RJ/Parati	2	P	DF	-	F	28	30824.5	SAMN17302244	MW577826	HiSeq4000	6555322	20-150	>31	693676	De novo	304794 (4.65)	99.9813	2549.88	63
181	2019-04-25	MG/Belo Horizonte	2	S	DF	Pregnant	F	21	78374.8	SAMN17302245	MW577827	HiSeq4000	5372464	20-150	>30	117045	De novo	70434 (1.31)	99.84	467.43	455
182	2019-05-03	MG/Araxa	2	P	DF	Pregnant	F	19	42263.5	SAMN17302246	MW577828	HiSeq4000	7331342	20-150	>29	59864	De novo	32693 (0.45)	99.9627	227.48	231
183	2019-04-02	MG/Betim	1	P	DF	-	M	59	232736	SAMN17302247	MW577829	HiSeq4000	9717188	20-150	>30	119199	De novo	71782 (0.74)	99.972	463.52	166
184	2019-04-15	MG/Arceburgo	0	P	DF	-	F	54	33296.6	SAMN17302248	MW577830	HiSeq4000	4151220	20-150	>30	50281	De novo	32334 (0.78)	99.9813	221.22	150
185	2010-03-09	RJ/Campos dos Goytacazes	2	S	WS	-	F	31	646719	SAMN17302249	MW577831	HiSeq4000	6142172	20-150	>31	2364447	De novo	581677 (9.47)	100	4306.15	59
186	2010-03-09	RJ/Campos dos Goytacazes	3	P	WS	-	M	13	16234.3	SAMN17302250	MW577832	HiSeq4000	6221079	20-150	>31	496840	De novo	218259 (3.51)	100	1691.78	119
187	2011-01-26	RJ/Campos dos Goytacazes	3	S	WS	-	F	24	61948.9	SAMN17302251	MW577833	HiSeq4000	3676404	20-150	>31	774893	De novo	311596 (8.48)	100	2701.78	42
188	2011-02-16	RJ/Campos dos Goytacazes	2	P	WS	-	M	31	1.321e+06	SAMN17302252	MW577834	HiSeq4000	10747318	20-150	>31	6225997	De novo	965834 (8.99)	100	6030.05	64
189	2010-01-30	RJ/Campos dos Goytacazes	1	P	WS	-	M	74	120982	SAMN17302253	MW577835	HiSeq4000	5808192	20-150	>31	510898	De novo	221952 (3.82)	99.96	1827.79	89
190	2019-03-19	MG/Araxa	2	S	WS	-	M	57	98875.2	SAMN17302254	MW577836	HiSeq4000	7807864	20-150	>30	119743	De novo	72519 (0.93)	99.5057	535.49	106
191	2009-09-16	RJ/Rio de Janeiro	0	S	WS	-	M	54	3775.93	SAMN17302255	MW577837	HiSeq4000	12312512	20-150	>28	27354	De novo	14411 (0.12)	99.5803	97.12	255
192	2011-02-16	RJ/Campos dos Goytacazes	2	S	WS	-	M	36	7328.22	SAMN17302256	MW577838	HiSeq4000	5069358	20-150	>29	54559	De novo	32996 (0.65)	99.9627	220.3	350
193	2019-05-08	MG/Belo Horizonte	3	P	WS	-	F	24	26072.2	SAMN17302257	MW577839	HiSeq4000	5912412	20-150	>28	62010	De novo	27746 (0.47)	99.92	177.48	256
194	2011-04-07	RJ/São Gonçalo	4	P	SD	-	M	0.6	3162.37	SAMN17302258	MW577840	HiSeq4000	6737846	20-150	>27	42467	De novo	17852 (0.26)	99.6083	109.75	243
195	2010-03-18	SP/Santos	4	P	SD	-	M	85.8919	71.7048	SAMN17302259	MW577841	HiSeq4000	8399360	20-150	>27	17449	De novo	8273 (0.10)	99.3845	54.51	547
196	2010-03-24	SP/Santos	5	P	SD	Decease	F	64.063	38.9466	SAMN17302260	MW577842	HiSeq4000	6357071	20-150	>27	38483	De novo	12355 (0.19)	99.7296	87.69	264
197	2008-02-23	RJ/Rio de Janeiro	6	P	SD	-	F	10	4.17444	SAMN17302261	MW577843	HiSeq4000	7517440	20-150	>28	13173	De novo	8151 (0.11)	99.3285	52.98	546
198	2008-02-23	RJ/Rio de Janeiro	7	P	SD	-	F	ND	37.9098	SAMN17302262	MW577844	HiSeq4000	8822894	20-150	>29	13741	De novo	8856 (0.10)	99.6456	56.54	194
199	2008-12-05	RJ/Duque de Caxias	7	S	SD	Decease	M	7	225.34	SAMN17302263	MW577845	HiSeq4000	5054790	20-150	>27	18048	De novo	7424 (0.15)	99.6083	49.9	204
200	2008-04-23	RJ/Rio de Janeiro	4	S	SD	Decease	F	44	669.12	SAMN17302264	MW577846	HiSeq4000	4795720	20-150	>28	23535	De novo	14758 (0.31)	99.8321	93.93	622
201	2008-02-08	RJ/Rio de Janeiro	4	S	SD	Decease	F	9	3.23103	SAMN17302265	MW577847	HiSeq4000	6061618	20-150	>28	19052	De novo	10291 (0.17)	99.0581	64.09	71
202	2010-04-04	SP/Santos	ND	P	SD	Decease	M	2	34476	SAMN17302266	MW577848	HiSeq4000	6219700	20-150	>31	586590	De novo	255529 (4.11)	99.972	1928.27	216
203	2008-03-16	RJ/Rio de Janeiro	5	P	SD	Decease	M	88	4763.6	SAMN17302267	MW577849	HiSeq4000	6857444	20-150	>30	62145	De novo	37657 (0.55)	100	306.86	184
204	2010-03-12	RJ/Rio de Janeiro	8	P	SD	Decease	F	50	6749.96	SAMN17302268	MW577850	HiSeq4000	5760686	20-150	>27	29708	De novo	12149 (0.21)	99.9161	84.72	272
205	2010-01-18	RJ/Campos dos Goytacazes	1	S	WS	-	M	19	38.4913	SAMN17302269	MW577851	HiSeq4000	3727624	20-150	>29	15116	De novo	10508 (0.28)	98.6851	71.39	599
206	2010-03-02	SP/Santos	5	S	WS	-	M	21.3634	5.03127	SAMN17302270	MW577852	HiSeq4000	8501734	20-150	>28	21459	De novo	10117 (0.12)	99.599	65.11	135
207	2009-03-17	RJ/Niteroi	5	S	WS	-	M	60	10.8279	SAMN17302271	MW577853	HiSeq4000	7898602	20-150	>28	9693	De novo	5803 (0.07)	98.6198	38.07	190
208	2008-02-07	RJ/Rio de Janeiro	24	P	SD	Decease	M	15	2.86067	SAMN17302272	MW577854	HiSeq4000	6773006	20-150	>27	14490	De novo	8089 (0.12)	99.226	51.07	104
209	2010-03-22	SP/Santos	6	P	SD	Decease	F	12.0548	7.52173	SAMN17302273	MW577855	HiSeq4000	6010820	20-150	>27	13525	De novo	6787 (0.11)	99.0115	44.75	161

## Sheet: Table S3
Supplementary Table 2 - Single nucleotide variants (iSNVs) + Long variants (iLVs, accounting for insertions+deletions) constituting viral mutant swarm of each sample. POS: position; REF: reference; ALT: altered; Aa: aminoacid; fs: frameshift.
Sample	137						138						139						140						141						142						143						144						145
Clinical classif. WHO2009	SD						WS						SD						SD						DF						DF						SD						WS						DF
Imune response	Primary						Primary						Primary						Primary						Secondary						Primary						Secondary						Primary						Secondary
Viral load (pfu/ml)	8.81						10100						34.2						361						11600						1610						281						760						247
Days of infection	9						2						5						10						5						5						ND						ND						3
	Genomic region	POS	REF	ALT	Aa substitution	Freq %	Genomic region	POS	REF	ALT	Aa substitution	Freq %	Genomic region	POS	REF	ALT	Aa substitution	Freq %	Genomic region	POS	REF	ALT	Aa substitution	Freq %	Genomic region	POS	REF	ALT	Aa substitution	Freq %	Genomic region	POS	REF	ALT	Aa substitution	Freq %	Genomic region	POS	REF	ALT	Aa substitution	Freq %	Genomic region	POS	REF	ALT	Aa substitution	Freq %	Genomic region
	5UTR	67	A	T	-	1.99	5UTR	70	G	GT	-	2.72	5UTR	67	A	T	-	2.67	E	2298	T	A	-	31.58	C	214	G	C	Gly40Arg	1.41	prM/M	545	T	A	Leu36His	2.79	E	2007	C	T	-	18.18	C	187	A	C	Lys31Gln	4.13	5UTR
	5UTR	70	G	GT	-	1.55	C	240	G	C	Met48Ile	1.51	C	110	G	GA	Lys5fs	3.21	NS3	5915	C	CA	Asn467fs	9.09	C	246	T	A	-	2.16	E	956	C	G	Ser7*	2.6	E	2010	G	A	-	18.18	E	1285	G	C	Ala117Pro	5.13	5UTR
	C	210	G	C	-	1.22	C	246	T	A	-	1.33	C	235	T	A	Phe47Ile	1.43	NS5	9827	G	T	Cys753Phe	9.38	C	357	G	C	Glu87Asp	1.58	E	1379	A	T	Glu148Val	3.3	NS1	3114	C	A	-	25	E	1798	A	T	Arg288*	4.3	C
	C	226	T	A	Leu44Ile	1.19	C	347	T	A	Phe84Tyr	1.46	C	399	A	T	-	1.04							C	392	G	C	Arg99Pro	0.92	NS1	2505	G	C	Trp28Cys	3.13	NS1	3129	A	G	-	23.53	NS1	3084	A	AT	Asn222fs	2.94	C
	C	229	A	T	Lys45*	0.97	prM/M	689	G	C	Gly84Ala	2.4	C	424	C	G	Pro110Ala	1.96							C	428	C	G	Thr111Arg	1.22	NS1	3152	C	CA	Asn245fs	3.33	NS2A	3663	C	T	-	16.67	NS2A	3689	G	C	Gly71Ala	4.85	prM/M
	C	363	A	T	-	1.35	prM/M	703	G	GA	Arg91fs	2.16	prM/M	506	T	C	Leu23Pro	1.17							prM/M	462	A	T	-	0.92	NS2A	3832	A	T	Thr119Ser	3.93	NS2A	3876	C	T	-	33.33	NS2B	4211	C	G	Pro27Arg	3.7	E
	C	367	A	C	Met91Leu	0.75	E	1040	C	CA	Asn37fs	4.17	prM/M	539	G	C	Cys34Ser	1.71							prM/M	481	G	C	Gly15Arg	1.56	NS3	4845	T	C	-	19.51	NS3	4562	G	A	Gly14Glu	27.27	NS3	5531	G	T	Arg337Ile	4.8	E
	C	369	G	C	Met91Ile	1	E	1102	C	G	Leu56Val	1.39	prM/M	677	G	C	Cys80Ser	2.23							prM/M	517	A	T	Thr27Ser	1.5	NS3	5915	C	CA	Asn467fs	7.87	NS3	5915	C	CA	Asn467fs	16.67	NS3	5915	C	CA	Asn467fs	8.51	E
	C	372	G	C	-	0.98	E	1357	A	T	Ile141Leu	1.28	prM/M	683	C	G	Thr82Ser	2.61							prM/M	523	G	C	Asp29His	0.93	NS4A-2K	6789	C	G	-	3.79	NS5	9034	C	T	-	22.22							E
	C	399	A	T	-	0.9	E	1833	C	G	Tyr299*	1.54	prM/M	703	G	GA	Arg91fs	1.24							prM/M	529	G	C	Val31Leu	1.08	NS5	7748	CA	C	Lys61fs	3.39	NS5	9840	Y	C	-	40							E
	prM/M	472	A	T	Met12Leu	1.33	E	1905	A	T	Arg323Ser	1.14	prM/M	770	T	A	Met111Lys	2.5							prM/M	538	T	A	Cys34Ser	1.08	NS5	9654	AC	A	Pro696fs	1.67	NS5	9909	T	C	-	40							NS1
	prM/M	522	G	C	Glu28Asp	1.31	E	1984	C	A	Arg350Ser	1.69	prM/M	801	G	T	Gln121His	2.06							prM/M	547	A	T	Met37Leu	0.69																			NS1
	prM/M	523	G	C	Asp29His	1.03	E	1990	A	T	Ile352Phe	1.87	prM/M	878	C	G	Thr147Arg	2.31							prM/M	582	A	T	-	1.12																			NS1
	prM/M	529	G	C	Val31Leu	1.48	NS1	2424	T	A	Asp1Glu	1.35	E	1018	G	C	Gly28Arg	2.02							prM/M	584	T	A	Ile49Asn	0.82																			NS1
	prM/M	548	T	A	Met37Lys	1.08	NS1	2511	G	C	Glu30Asp	1.48	E	1112	A	T	Tyr59Phe	1.63							prM/M	593	A	T	Lys52Met	0.8																			NS1
	prM/M	582	A	T	-	1.34	NS1	2533	T	A	Ser38Thr	0.87	E	1265	A	T	Lys110 Met	1.88							prM/M	615	T	A	Asn59Lys	0.95																			NS1
	prM/M	731	A	T	His98Leu	1.1	NS1	2605	A	T	Arg62*	1.43	E	1696	G	C	Gly254Arg	4.92							prM/M	683	C	G	Thr82Ser	1.14																			NS1
	prM/M	741	G	C	Met101Ile	1.03	NS1	2611	G	C	Glu64Gln	1.38	E	1853	T	A	Phe306Tyr	1.82							prM/M	703	G	GA	Arg91fs	0.83																			NS1
	prM/M	888	A	T	Gln150His	1.69	NS1	2643	A	T	Glu74Asp	1.58	E	1907	T	A	Val324Glu	2.16							prM/M	732	T	A	His98Gln	1.04																			NS1
	E	950	G	C	Gly5Ala	1	NS1	2650	C	G	His77Asp	1.28	E	2035	A	T	Ile367Leu	2.11							prM/M	762	A	T	Glu108Asp	1.12																			NS2A
	E	1127	A	T	Lys64Met	1.14	NS1	2665	A	T	Asn82Tyr	1.18	E	2155	A	T	Arg407Trp	1.83							prM/M	769	A	T	Met111Leu	0.94																			NS2A
	E	1289	T	A	Met118Lys	1.25	NS1	2680	A	T	Thr87Ser	1.04	E	2295	G	C	Trp453Cys	2.39							prM/M	860	C	G	Ala141Gly	1.11																			NS2A
	E	1297	T	A	Cys121Ser	0.96	NS1	2683	A	T	Ile88Phe	0.98	NS1	2505	G	C	Trp28Cys	1.79							prM/M	878	C	G	Thr147Arg	1.45																			NS2B
	E	1467	C	G	-	1.26	NS1	2797	A	T	Thr126Ser	1.66	NS1	2511	G	C	Glu30Asp	2.35							prM/M	884	T	A	Phe149Tyr	1.42																			NS2B
	E	1545	T	C	-	11.29	NS1	2962	C	T	-	30.04	NS1	2656	C	T	-	39.64							prM/M	888	A	T	Gln150His	0.96																			NS3
	E	1599	G	A	-	23.4	NS1	3152	C	CA	Asn245fs	4.36	NS1	3059	AG	A	Ala213fs	0.77							E	937	A	C	Met1Leu	0.98																			NS3
	E	1641	G	C	Glu235Asp	3.43	NS1	3237	G	C	Lys272Asn	1.82	NS1	3152	C	CA	Asn245fs	1.4							E	945	C	G	Cys3Trp	1.02																			NS3
	E	1724	C	A	Ala263Glu	1.69	NS1	3307	C	G	Pro296Ala	1.76	NS1	3375	A	T	Leu318Phe	1.39							E	964	G	C	Asp10His	0.89																			NS3
	E	1885	C	G	His317Asp	1.35	NS1	3418	A	T	Met333Leu	1.69	NS2A	3689	G	C	Gly71Ala	1.94							E	1040	C	CA	Asn37fs	2.16																			NS3
	E	1903	A	T	Arg323*	1.55	NS1	3446	A	T	Glu342Val	2.16	NS2A	3827	C	G	Pro117Arg	1.51							E	1056	A	T	-	1.24																			NS3
	E	2065	T	A	Tyr377Asn	1.22	NS2A	3849	T	A	-	1.13	NS2A	3838	C	G	Leu121Val	1.84							E	1101	T	A	-	0.71																			NS3
	E	2226	A	T	-	1.12	NS2A	3985	A	T	Thr170Ser	1.68	NS2A	3848	C	G	Thr124Ser	2.43							E	1102	C	G	Leu56Val	0.9																			NS3
	E	2275	G	C	Ala447Pro	1.4	NS2A	3998	C	A	Ala174Glu	1.53	NS3	4599	G	C	Lys26Asn	3.15							E	1112	A	T	Tyr59Phe	1.34																			NS3
	NS1	2492	A	T	Asn24Ile	1.7	NS2A	4013	C	G	Pro179Arg	1.68	NS3	4691	T	A	Val57Asp	4.01							E	1127	A	T	Lys64Met	1.68																			NS3
	NS1	2505	G	C	Trp28Cys	2.09	NS2A	4019	T	A	Leu181His	1.53	NS3	4908	C	T	-	3.5							E	1164	A	T	-	1.45																			NS3
	NS1	2667	T	G	Asn82Lys	1.38	NS2A	4023	A	T	Leu182Phe	1.12	NS3	4986	C	G	-	1.38							E	1174	C	G	Pro80Ala	1.35																			NS3
	NS1	2687	T	A	Met89Lys	1.77	NS2A	4045	G	C	Asp190His	1.13	NS3	5092	A	T	Met191Leu	3.57							E	1214	A	T	Lys93Ile	0.8																			NS3
	NS1	2750	A	T	Glu110Val	1.3	NS2B	4205	A	T	Asp25Val	1.06	NS3	5186	C	G	Ala222Gly	5.26							E	1224	G	C	Met96Ile	1.67																			NS3
	NS1	3026	T	A	Ile202Lys	1.23	NS2B	4216	A	T	Thr29Ser	1.99	NS3	5192	C	G	Thr224Ser	6.9							E	1279	A	T	Thr115Ser	1.42																			NS3
	NS1	3114	C	G	-	1.31	NS3	4643	A	T	Tyr41Phe	1.64	NS3	5377	G	C	Ala286Pro	3.15							E	1285	G	C	Ala117Pro	1.61																			NS3
	NS1	3122	A	T	Asn234Ile	1.58	NS3	4829	G	GA	Asn105fs	1.84	NS3	5531	G	T	Arg337Ile	4.78							E	1296	A	T	Arg120Ser	0.89																			NS4A
	NS1	3133	G	C	Glu238Gln	1.62	NS3	5024	C	G	Thr168Ser	0.94	NS3	5572	G	C	Val351Leu	2.61							E	1297	T	A	Cys121Ser	0.92																			NS4A
	NS1	3152	C	CA	Asn245fs	1.72	NS3	5154	C	G	-	1.37	NS3	5699	A	T	Glu393Val	2.51							E	1367	A	T	His144Leu	1.42																			NS4A
	NS1	3335	G	C	Gly305Ala	1.98	NS3	5176	T	A	Leu219Ile	1.44	NS3	6041	G	C	Ser507Thr	2.09							E	1368	C	G	His144Gln	0.8																			NS4A
	NS1	3394	G	C	Gly325Arg	1.83	NS3	5447	C	G	Ala309Gly	1.43	NS3	6308	T	A	Leu596*	2.58							E	1377	A	T	Glu147Asp	0.81																			NS4A
	NS2A	3689	G	C	Gly71Ala	1.44	NS3	5522	A	T	Asp334Val	1.49	NS4A	6611	G	C	Gly79Ala	2.75							E	1449	A	T	-	0.86																			NS4A
	NS2A	3785	T	G	Met103Arg	0.87	NS3	5567	A	T	Glu349Val	1.59	NS4A	6617	T	A	Met81Lys	2.86							E	1473	C	G	-	0.89																			NS4A
	NS2A	3918	G	C	-	1.28	NS3	5659	A	T	Lys380*	1.96	NS4A	6711	G	GT	Leu115fs	2.08							E	1516	A	T	Asn194Tyr	1.1																			NS4A
	NS2B	4259	T	A	Val43Glu	2.39	NS3	5694	C	G	Asp391Glu	2.06	NS4B	6907	C	G	Leu28Val	3.28							E	1521	G	C	Glu195Asp	0.9																			NS4B
	NS2B	4260	G	C	-	2.39	NS3	5696	C	A	Ser392Tyr	1.14	NS4B	7049	T	C	Leu75Ser	1.46							E	1522	A	T	Met196Leu	1.08																			NS4B
	NS2B	4462	C	G	Pro111Ala	1.74	NS3	5699	A	T	Glu393Val	1.04	NS4B	7537	T	A	Ser238Thr	2.35							E	1560	G	C	-	0.88																			NS4B
	NS3	4566	A	G	-	2.51	NS3	5718	C	G	-	2.23	NS5	8238	T	A	Asn223Lys	1.73							E	1585	C	G	Pro217Ala	0.79																			NS4B
	NS3	4604	G	C	Arg28Thr	2.17	NS3	5832	C	G	-	2.35	NS5	8398	A	T	Ile277Phe	2.33							E	1596	G	C	Trp220Cys	0.97																			NS5
	NS3	4761	A	T	-	1.15	NS3	5870	C	G	Thr450Ser	2.7	NS5	8623	C	G	Gln352Glu	1.55							E	1611	T	A	Asp225Glu	0.72																			NS5
	NS3	4848	C	G	-	1.67	NS3	5915	C	CA	Asn467fs	10.91	NS5	8744	G	C	Arg392Thr	1.3							E	1612	A	T	Thr226Ser	0.7																			NS5
	NS3	5086	A	T	Thr189Ser	1.56	NS4A	6645	A	T	-	1.55	NS5	8913	A	T	Glu448Asp	1.97							E	1620	A	T	-	0.82																			NS5
	NS3	5089	A	T	Ile190Phe	1.75	NS4A	6658	C	G	Leu95Val	1.53	NS5	8932	A	T	Met455Leu	1.27							E	1625	A	T	Asn230Ile	1.03																			NS5
	NS3	5092	A	T	Met191Leu	2.12	NS4A-2K	6789	C	G	-	1.95	NS5	8986	G	GCCACATGTA	Ala474insThrCysThr	0.57							E	1631	T	A	Ile232Lys	1.12																			NS5
	NS3	5376	A	G	-	1.52	NS4B	6949	G	C	Ala42Pro	1.78	NS5	8991	A	T	-	1.51							E	1635	G	C	Gln233His	1.3																			NS5
	NS3	5493	A	T	-	1.64	NS4B	6955	G	T	Ala44Ser	1.43	NS5	9182	G	C	Trp538Ser	2.41							E	1686	C	G	-	1.18																			NS5
	NS3	5503	A	T	Ser328Cys	1.46	NS4B	6983	G	T	Arg53Ile	2.81	NS5	9293	A	T	Asn575Ile	1.71							E	1702	C	G	Gln256Glu	0.97																			NS5
	NS3	5754	A	T	-	2.73	NS4B	7180	G	C	Ala119Pro	1.68	NS5	9324	A	T	-	1.35							E	1706	A	T	Glu257Val	0.85																			NS5
	NS3	5861	T	A	Met447Lys	3.79	NS4B	7273	A	T	Ile150Leu	2.01	NS5	9330	C	G	-	1.61							E	1724	C	G	Ala263Gly	1																			NS5
	NS3	5873	A	G	His451Arg	3.98	NS4B	7333	C	G	Gln170Glu	2.24	NS5	9437	T	A	Met623Lys	2.14							E	1729	A	T	Thr265Ser	1.01																			NS5
	NS3	5915	C	CA	Asn467fs	6.95	NS4B	7363	C	G	Gln180Glu	1.65	NS5	9569	T	A	Val667Glu	1.59							E	1731	A	C	-	0.75																			NS5
	NS3	6018	C	G	Asn499Lys	1.87	NS4B	7385	C	G	Thr187Arg	2.76	NS5	9634	A	T	Lys689*	1.2							E	1740	A	T	-	0.91																			NS5
	NS3	6049	G	C	Glu510Gln	1.78	NS5	8306	A	T	Lys246Ile	1.35	NS5	9735	C	G	-	3.37							E	1789	T	A	Cys285Ser	0.99																			NS5
	NS4A	6546	A	G	-	1.23	NS5	8442	A	T	-	2.2	NS5	9999	G	T	-	10.26							E	1821	A	T	Lys295Asn	1.05																			NS5
	NS4A	6573	A	T	-	1.69	NS5	8847	T	A	-	2.17	NS5	10205	A	C	Tyr879Ser	2.05							E	1827	G	C	Met297Ile	1.37																			NS5
	NS4A	6652	A	T	Ile93Phe	1.27	NS5	8926	A	AC	Asn453fs	0.77	NS5	10212	C	G	Asp881Glu	2							E	1838	T	A	Met301Lys	0.91																			NS5
	NS4A	6711	G	GT	Leu115fs	1.16	NS5	9112	C	G	Leu515Val	2.45	3UTR	10353	C	G	-	3.02							E	1853	T	A	Phe306Tyr	1.67																			3UTR
	NS4B	6901	A	T	Asn26Tyr	1.87	NS5	9550	A	T	Ser661Cys	1.96													E	1885	C	G	His317Asp	1.21																			3UTR
	NS4B	6930	A	T	-	1.37	NS5	9705	T	TC	Phe713fs	0.53													E	1886	A	T	His317Leu	0.89
	NS4B	6996	A	T	Glu57Asp	1.44	NS5	9736	G	C	Val723Leu	1.22													E	1906	G	C	Val324Leu	0.72
	NS4B	7011	T	C	-	11.18	NS5	9757	A	T	Asn730Tyr	1.23													E	1931	C	G	Pro332Arg	0.97
	NS4B	7120	T	A	Tyr99Asn	1.12	NS5	9847	C	G	Gln760Glu	1.09													E	1944	T	A	-	1.12
	NS4B	7131	C	A	-	1.3	NS5	9926	A	T	His786Leu	1.34													E	1988	T	A	Leu351Gln	1
	NS4B	7277	C	G	Thr151Arg	1.8	NS5	10015	G	C	Val816Leu	1.53													E	1990	A	T	Ile352Phe	1.19
	NS4B	7282	A	T	Ile153Phe	1.27	NS5	10066	T	A	Trp833Arg	1.75													E	2088	G	T	-	1.55
	NS5	7752	A	G	-	2	NS5	10167	A	T	-	2.11													E	2155	A	T	Arg407Trp	1.2
	NS5	7791	A	G	-	3.91	NS5	10182	A	T	Arg871Ser	1.96													E	2161	G	C	Ala409Pro	1.23
	NS5	7994	C	G	Thr142Arg	1.75																			E	2214	A	T	-	1.14
	NS5	8018	C	G	Ser150*	1.58																			E	2275	G	C	Ala447Pro	0.88
	NS5	8104	T	G	Cys179Gly	2																			E	2342	A	T	Asn469Ile	0.79
	NS5	8143	G	GA	Met194fs	0.55																			E	2399	A	T	Tyr488Phe	0.91
	NS5	8204	G	T	Arg212Leu	1.47																			NS1	2480	T	A	Phe20Tyr	0.81
	NS5	8238	T	A	Asn223Lys	1.65																			NS1	2493	C	G	Asn24Lys	0.77
	NS5	8272	A	T	Ile235Phe	0.86																			NS1	2494	G	C	Val25Leu	0.97
	NS5	8342	T	A	Leu258His	1.33																			NS1	2495	T	A	Val25Glu	1.07
	NS5	8383	C	G	Pro272Ala	1.23																			NS1	2500	A	T	Thr27Ser	0.95
	NS5	8514	A	T	-	1.41																			NS1	2506	A	T	Thr29Ser	0.89
	NS5	8518	G	C	Ala317Pro	1.21																			NS1	2510	A	T	Glu30Val	0.84
	NS5	8613	A	G	-	1.35																			NS1	2511	G	C	Glu30Asp	1.37
	NS5	8650	A	T	Thr361Ser	1.22																			NS1	2517	T	A	Tyr32*	1.54
	NS5	8659	C	G	-	1.34																			NS1	2569	C	G	His50Asp	0.81
	NS5	8787	T	A	Asn406Lys	1.42																			NS1	2595	C	G	-	1.18
	NS5	8906	A	T	Lys446Met	0.85																			NS1	2637	A	T	-	1.15
	NS5	8908	T	A	Cys447Ser	1.18																			NS1	2643	A	T	Glu74Asp	1.44
	NS5	8910	T	A	Cys447*	1.25																			NS1	2658	A	T	-	0.68
	NS5	8913	A	T	Glu448Asp	1.8																			NS1	2664	A	T	Glu81Asp	1.16
	NS5	8932	A	T	Met455Leu	0.74																			NS1	2786	A	T	Lys122Ile	1.34
	NS5	8998	A	T	Met477Leu	1.09																			NS1	2971	A	C	Met184Leu	1.16
	NS5	9004	C	G	Leu479Val	1.76																			NS1	3011	A	T	Asp197Val	1.18
	NS5	9074	A	G	Asn502Ser	2.28																			NS1	3074	T	A	Ile218Asn	1.11
	NS5	9093	A	G	-	2.13																			NS1	3123	T	A	Asn234Lys	0.95
	NS5	9099	A	G	-	4.44																			NS1	3152	C	CA	Asn245fs	3.08
	NS5	9114	A	G	-	2.99																			NS1	3206	C	G	Thr262Arg	1.36
	NS5	9239	T	A	Met557Lys	1.94																			NS1	3284	C	G	Thr288Ser	1.48
	NS5	9463	A	C	Ile632Leu	1.4																			NS1	3299	A	T	Asn293Ile	1.23
	NS5	9503	A	T	Asn645Ile	1.51																			NS1	3309	C	A	-	1.57
	NS5	9569	T	A	Val667Glu	1.15																			NS1	3323	C	G	Thr301Ser	1.11
	NS5	9593	C	G	Ala675Gly	1.38																			NS1	3345	A	T	-	0.79
	NS5	9595	A	T	Ser676Cys	1.29																			NS1	3350	A	T	Glu310Val	0.83
	NS5	9705	T	TC	Phe713fs	0.62																			NS1	3375	A	T	Leu318Phe	0.87
	NS5	9744	A	G	-	2.19																			NS1	3385	A	T	Arg322*	0.87
	NS5	9899	A	G	Asn777Ser	6.02																			NS1	3475	G	C	Ala352Pro	1.35
	NS5	9912	G	A	-	6.25																			NS2A	3540	A	T	Glu21Asp	1.38
	NS5	10089	A	G	-	12.48																			NS2A	3611	C	G	Thr45Arg	1.15
	NS5	10142	C	G	Thr858Ser	1.28																			NS2A	3617	A	T	Asn47Ile	0.87
	NS5	10167	A	T	-	0.92																			NS2A	3633	C	G	Asp52Glu	1.33
	NS5	10196	A	T	Asn876Ile	1.19																			NS2A	3655	G	C	Val60Leu	0.91
	NS5	10217	T	A	Met883Lys	1.23																			NS2A	3689	G	C	Gly71Ala	0.92
	NS5	10218	G	C	Met883Ile	1.07																			NS2A	3763	C	G	Leu96Val	1.24
	3UTR	10286	C	G		1.35																			NS2A	3787	G	C	Ala104Pro	0.91
	3UTR	10314	A	T		1.31																			NS2A	3793	A	T	Ile106Leu	1.14
	3UTR	10566	T	C		10.17																			NS2A	3848	C	G	Thr124Ser	1.25
	3UTR	10611	C	CA		12.5																			NS2A	3889	A	T	Arg138*	0.72
	3UTR	10611	C	CAA		41.25																			NS2A	3918	G	C	-	0.87
	3UTR	10611	C	CAAA		10																			NS2A	3924	C	G	Ile149Met	0.88
	3UTR	10611	C	CAAAA		3.75																			NS2A	3940	G	T	Val155Phe	0.93
																									NS2A	3943	C	G	Pro156Ala	0.99
																									NS2A	4013	C	G	Pro179Arg	1.35
																									NS2A	4061	C	G	Ala195Gly	1.16
																									NS2B	4205	A	T	Asp25Val	0.69
																									NS2B	4216	A	T	Thr29Ser	0.99
																									NS2B	4339	A	T	Ser70Cys	1.13
																									NS2B	4365	A	T	-	0.95
																									NS2B	4370	A	T	Glu80Val	0.83
																									NS2B	4431	A	T	Arg100Ser	0.96
																									NS2B	4452	A	T	-	0.9
																									NS3	4528	G	T	Val3Leu	0.83
																									NS3	4530	A	T	-	1.19
																									NS3	4583	G	C	Gly21Ala	1.05
																									NS3	4585	G	T	Ala22Ser	1.69
																									NS3	4649	A	T	Glu43Val	1.22
																									NS3	4891	G	C	Gly124Arg	1.18
																									NS3	4895	C	G	Ala125Gly	1.04
																									NS3	4896	T	A	-	1.05
																									NS3	4897	G	C	Val126Leu	1.16
																									NS3	5046	T	A	Asn175Lys	1.17
																									NS3	5086	A	T	Thr189Ser	1.52
																									NS3	5102	A	T	His194Leu	1.06
																									NS3	5180	T	A	Ile220Asn	1.22
																									NS3	5186	C	G	Ala222Gly	0.9
																									NS3	5188	C	G	Pro223Ala	1.02
																									NS3	5211	A	T	Glu230Asp	1.26
																									NS3	5225	T	A	Leu235His	0.82
																									NS3	5234	T	A	Leu238His	0.81
																									NS3	5299	A	T	Met260Leu	1.09
																									NS3	5324	G	C	Arg268Thr	0.79
																									NS3	5330	T	A	Leu270Gln	1.11
																									NS3	5340	C	T	-	5.75
																									NS3	5419	A	T	Ile300Phe	0.99
																									NS3	5425	A	T	Thr302Ser	1.7
																									NS3	5474	C	G	Pro318Arg	1.23
																									NS3	5493	A	T	-	0.84
																									NS3	5499	T	A	-	0.78
																									NS3	5510	C	G	Ala330Gly	0.88
																									NS3	5632	A	T	Ile371Leu	1.28
																									NS3	5672	A	T	Gln384Leu	1.13
																									NS3	5694	C	G	Asp391Glu	1.65
																									NS3	5702	A	C	Tyr394Ser	0.92
																									NS3	5706	T	A	-	1.1
																									NS3	5710	A	T	Thr397Ser	1.04
																									NS3	5711	C	G	Thr397Ser	1.11
																									NS3	5884	G	T	Ala455Ser	1.42
																									NS3	5886	G	C	-	1.72
																									NS3	5897	G	C	Gly459Ala	1.42
																									NS3	5915	C	CA	Asn467fs	7.84
																									NS3	5971	G	C	Asp484His	1
																									NS3	6041	G	C	Ser507Thr	1.09
																									NS3	6047	T	A	Phe509Tyr	1.79
																									NS3	6071	A	T	Asp517Val	1.03
																									NS3	6192	C	G	Tyr557*	1.78
																									NS3	6214	G	C	Asp565His	1.14
																									NS3	6240	G	T	-	1.52
																									NS3	6242	A	T	Glu574Val	1.04
																									NS3	6335	T	A	Leu605Gln	1.06
																									NS4A	6475	G	C	Ala34Pro	0.97
																									NS4A	6504	T	A	His43Gln	1.04
																									NS4A	6616	A	T	Met81Leu	0.85
																									NS4A	6654	T	C	-	1.11
																									NS4A	6664	T	A	Tyr97Asn	6.15
																									NS4A	6668	C	G	Ala98Gly	1.04
																									NS4A	6674	T	A	Ile100Lys	0.94
																									NS4A	6678	A	T	Gln101His	1.17
																									NS4A	6726	T	C	-	8.54
																									NS4A	6730	C	G	Leu119Val	1.79
																									NS4A	6736	C	G	Pro121Ala	2.03
																									NS4B	6931	T	A	Ser36Thr	1.1
																									NS4B	6979	T	A	Leu52Met	1.09
																									NS4B	7006	G	C	Val61Leu	0.93
																									NS4B	7039	G	C	Ala72Pro	0.83
																									NS4B	7041	T	A	-	0.94
																									NS4B	7145	T	A	Leu107His	0.75
																									NS4B	7272	A	T	-	0.71
																									NS4B	7276	A	T	Thr151Ser	1.25
																									NS4B	7283	T	A	Ile153Asn	0.96
																									NS4B	7306	G	C	Asp161His	1.09
																									NS4B	7332	A	T	-	1.42
																									NS4B	7336	G	C	Val171Leu	0.99
																									NS4B	7339	A	T	Met172Leu	0.95
																									NS4B	7348	A	T	Ile175Phe	0.9
																									NS4B	7378	A	T	Arg185Trp	0.79
																									NS4B	7433	C	G	Thr203Arg	1.59
																									NS4B	7539	C	G	-	1.65
																									NS4B	7560	C	A	Asn245Lys	1.02
																									NS5	7570	G	T	Gly1*	1.17
																									NS5	7582	G	C	Val5Leu	1.8
																									NS5	7689	A	T	Leu40Phe	1.22
																									NS5	7730	C	G	Ala54Gly	1.12
																									NS5	7835	A	T	Tyr89Phe	1.6
																									NS5	7866	A	C	Glu99Asp	0.94
																									NS5	7911	C	G	Ile114Met	1.24
																									NS5	8004	T	A	Cys145*	1.12
																									NS5	8004	T	C	-	1.36
																									NS5	8071	G	C	Val168Leu	1.15
																									NS5	8130	G	C	Met187Ile	0.74
																									NS5	8162	A	T	Gln198Leu	0.78
																									NS5	8217	T	A	His216Gln	0.76
																									NS5	8230	G	C	Val221Leu	0.99
																									NS5	8238	T	A	Asn223Lys	0.92
																									NS5	8243	C	G	Ser225Cys	0.96
																									NS5	8263	G	C	Val232Leu	0.87
																									NS5	8278	A	T	Arg237Trp	0.86
																									NS5	8312	A	T	Lys248Met	1.34
																									NS5	8322	C	G	-	1.45
																									NS5	8334	T	A	Asp255Glu	0.99
																									NS5	8383	C	G	Pro272Ala	0.98
																									NS5	8393	A	T	Asp275Val	1.21
																									NS5	8442	A	T	-	1.16
																									NS5	8472	A	T	Lys301Asn	1.28
																									NS5	8524	T	A	Ser319Thr	1.43
																									NS5	8534	A	T	Asn322Ile	1.1
																									NS5	8536	G	C	Gly323Arg	1.17
																									NS5	8684	A	T	Lys372Ile	2.39
																									NS5	8721	A	T	Glu384Asp	1.15
																									NS5	8736	G	C	Lys389Asn	1.21
																									NS5	8742	T	A	-	1.23
																									NS5	8919	T	A	Cys450*	1.36
																									NS5	8972	C	G	Ala468Gly	1.25
																									NS5	8982	C	G	Ser471Arg	1.44
																									NS5	9004	C	G	Leu479Val	1.56
																									NS5	9106	C	G	His513Asp	1.24
																									NS5	9112	C	G	Leu515Val	2.1
																									NS5	9142	A	T	Lys525*	1.32
																									NS5	9489	A	T	Glu640Asp	1.38
																									NS5	9502	A	T	Asn645Tyr	1.4
																									NS5	9565	G	C	Val666Leu	1.14
																									NS5	9603	A	T	Leu678Phe	0.81
																									NS5	9628	G	C	Ile687Leu	0.97
																									NS5	9634	A	T	Lys689*	0.87
																									NS5	9649	T	A	Trp694Arg	1.18
																									NS5	9658	T	A	Ser697Thr	0.97
																									NS5	9683	A	T	Gln705Leu	1.32
																									NS5	9689	C	G	Pro707Arg	0.9
																									NS5	9692	T	A	Phe708Tyr	0.79
																									NS5	9696	T	A	Cys709*	1.25
																									NS5	9702	C	G	His711Gln	1.8
																									NS5	9742	G	C	Val725Leu	1.19
																									NS5	9753	C	G	Cys728Trp	0.89
																									NS5	9757	A	T	Asn730Tyr	1.36
																									NS5	9767	A	C	Glu733Ala	0.81
																									NS5	9773	T	A	Ile735Asn	0.92
																									NS5	9775	G	C	Gly736Arg	1.07
																									NS5	9781	G	C	Ala738Pro	1.23
																									NS5	9815	A	T	Arg749Leu	1.53
																									NS5	9839	C	G	Ser757Cys	1.04
																									NS5	9851	T	A	Met761Lys	1.07
																									NS5	9858	C	G	Ser763Arg	1.18
																									NS5	9876	A	T	Arg769Ser	1.17
																									NS5	9877	C	G	Arg770Gly	1.06
																									NS5	9882	C	G	Asp771Glu	1.16
																									NS5	9939	A	T	-	1.01
																									NS5	10015	G	C	Val816Leu	1.27
																									NS5	10066	T	A	Trp833Arg	0.91
																									NS5	10120	A	T	Ile851Phe	1.12
																									NS5	10135	A	T	Arg856Trp	0.95
																									NS5	10142	C	G	Thr858Ser	1.18
																									NS5	10167	A	T	-	0.84
																									NS5	10206	C	G	Tyr879*	1.51
																									3UTR	10357	G	C	-	0.92
																									3UTR	10410	A	T	-	1.07
																									3UTR	10422	G	C	-	1.64
																									3UTR	10436	G	C	-	1.38
																									3UTR	10443	T	TA	-	0.6
																									3UTR	10487	C	G	-	1.18
																									3UTR	10578	A	T	-	1.6
																									3UTR	10583	C	G	-	2.49
																									3UTR	10587	A	T	-	1.65
																									3UTR	10666	A	T	-	3.32
[truncated: 359 more columns]

## Sheet: Figure S4
Supplementary Figure 4 - Percentage of unique variants in mutant swarms of cases grouped by clinical classification. Each point represents the value of a single sample, and error bars represent the mean with standard deviation for each category.
DF: dengue fever; WS: dengue with warning signs; SD: severe dengue.
ANOVA test for means' comparison, p>0.05

## Sheet: Table S5
Supplementary Table 5 - Repetitive NS-iSNVs + UTR-iSNVs clustered by subgroups according to their interhost frequency within the clinical categories. In bold: interhost frequencies higher than 25%. Aa: amino acid; DF: dengue fever; WS: dengue with warning signs; SD: severe dengue; P: primary infection; S: secondary infection; freq: frequency.
Genome region	iSNV	Aa substitution	Relevant aa subs.	Total (n)	DF (%)	WS (%)	SD (%)	Intrahost freq range DF	Intrahost freq range WS	Intrahost freq range SD	P (%)	S (%)
Subgroup 1 - DF (16-48%, n=5-15)
E	G1595T	Trp220Leu	Yes	15	48.3871	0	0	1-2	-	-	28.2051	13.7931
E	T2276C	Val447Ala	-	5	16.129	0	0	1-34	-	-	10.2564	3.44828
E	A2303G	Lys456Arg	-	7	22.5806	0	0	1-2	-	-	10.2564	10.3448
E	C2308T	Leu458Phe	Yes	14	45.1613	0	0	1-2	-	-	28.2051	10.3448
E	G2315T	Gly460Val	-	9	29.0323	0	0	1-2	-	-	15.3846	10.3448
NS2A	C3716T	Ala80Val	-	10	32.2581	0	0	1	-	-	20.5128	6.89655
NS3	A5543C	Glu341Ala	Yes	7	22.5806	0	0	1-2	-	-	12.8205	6.89655
NS3	C5839T	Arg440Trp	Yes	13	41.9355	0	0	1-3	-	-	25.641	10.3448
NS3	G6220A	Val567Ile	-	6	19.3548	0	0	1-17	-	-	7.69231	10.3448
NS3	C6365T	Ala615Val	-	13	41.9355	0	0	1-2	-	-	28.2051	6.89655
NS4A	A6418G	Thr15Ala	Yes	5	16.129	0	0	1-2	-	-	12.8205	0
NS4A	C6655T	Leu94Phe	Yes	6	19.3548	0	0	1	-	-	7.69231	10.3448
NS4B	A6913G	Ile30Val	-	5	16.129	0	0	1	-	-	12.8205	0
NS5	T7763C	Phe65Ser	Yes	5	16.129	0	0	3-7	-	-	7.69231	6.89655
NS5	G8184C	Leu205Phe	Yes	6	19.3548	0	0	1-2	-	-	12.8205	3.44828
NS5	G8602A	Asp345Asn	Yes	12	38.7097	0	0	1-4	-	-	20.5128	13.7931
NS5	C9877T	Arg770Cys	Yes	5	16.129	0	0	1	-	-	7.69231	6.89655
3UTR	10389delAA	-	-	5	16.129	0	0	4-26	-	-	7.69231	6.89655
3UTR	10613insA	-	-	5	16.129	0	0	1-6	-	-	7.69231	6.89655
Subgroup 2 - WS+SD (5-26%, n=1-5 WS; 6-50%, n=1-9 SD)
prM/M	C893T	Ala152Val	-	9	0	15.7895	33.3333	-	3-15	4-32	12.8205	13.7931
E	A1001C	Asp22Ala	Yes	6	0	26.3158	5.55556	-	1	1	10.2564	6.89655
E	A2023G	Ser363Ala	Yes	8	0	26.3158	16.6667	-	1-38	2-34	12.8205	10.3448
E	G2024C			7	0	26.3158	11.1111	-	1-40	25-34	10.2564	10.3448
NS1	A2434G	Ile5Val	-	6	0	10.5263	22.2222	-	2-28	4-42	12.8205	3.44828
NS1	C2878A	Leu153Met	-	9	0	15.7895	33.3333	-	24-35	17-44	10.2564	17.2414
NS2A	G3629A	Arg51Lys	-	11	0	26.3158	33.3333	-	1-48	1-48	17.9487	13.7931
NS2A	C3875T	Ala133Val	-	11	0	26.3158	33.3333	-	1-50	1-37	15.3846	17.2414
NS2B	A4310G	Lys60Arg	-	5	0	5.26316	22.2222	-	3	11-18	7.69231	6.89655
NS3	A6167G	Lys549Arg	-	7	0	15.7895	22.2222	-	4-31	1-23	7.69231	13.7931
NS3	A6220G	Ile567Val	-	9	0	15.7895	33.3333	-	4-35	7-45	12.8205	13.7931
NS4A	A6491G	Lys39Arg	-	10	0	10.5263	44.4444	-	10-38	3-42	15.3846	13.7931
NS4A	T6496C	Tyr41His	Yes	12	0	15.7895	50	-	7-33	3-47	17.9487	17.2414
NS4A	C6500A	Thr42Asn	-	12	0	15.7895	50	-	7-31	3-44	17.9487	17.2414
NS4A	A6512G	Asn46Ser	-	5	0	5.26316	22.2222	-	19	23-45	7.69231	6.89655
NS4A	G6562A	Ala63Thr	Yes	11	0	10.5263	50	-	13-32	3-43	17.9487	13.7931
NS4A	G6625A	Gly84Arg	Yes	6	0	26.3158	5.55556	-	1	1	10.2564	6.89655
NS4B	A6880G	Thr19Ala	Yes	5	0	5.26316	22.2222	-	21	8-21	7.69231	6.89655
NS5	G8803A	Val412Ile	-	10	0	15.7895	38.8889	-	1-31	25-48	17.9487	10.3448
NS5	G9501C	Gln644His	Yes	9	0	21.0526	27.7778	-	3-47	2-38	12.8205	13.7931
NS5	A10075G	Ile836Val	-	5	0	10.5263	16.6667	-	1-17	21-46	7.69231	6.89655
NS5	G10202A	Gly878Glu	Yes	7	0	21.0526	16.6667	-	1-22	2-41	12.8205	6.89655
NS5	G10252A	Glu895Lys	Yes	6	0	21.0526	11.1111	-	4-38	8-29	5.12821	13.7931
3UTR	10389insAA	-	-	9	0	10.5263	38.8889	-	2-29	3-30	15.3846	10.3448
Subgroup 3 - WS+SD (5-11%, n=1-2 WS; 6-17%, n=1-3 SD)
C	A187C	Lys31Gln	Yes	3	0	10.5263	5.55556	-	3-4	1	7.69231	0
C	T235A	Phe47Ile	Yes	2	0	5.26316	5.55556	-	2.3	1.4	5.12821	0
C	G406A	Val104Met	-	2	0	5.26316	5.55556	-	13	22	2.5641	3.44828
C	T431C	Val112Ala	-	3	0	10.5263	5.55556	-	15-27	29	5.12821	3.44828
prM/M	G481A	Gly15Ser	Yes	3	0	5.26316	11.1111	-	5	3-11	2.5641	6.89655
prM/M	A523G	Asn29Asp	Yes	3	0	5.26316	11.1111	-	25	26-39	5.12821	3.44828
prM/M	A555G	Ile39Met	-	3	0	5.26316	11.1111	-	6	4-7	2.5641	6.89655
prM/M	A731T	His98Leu	Yes	2	0	5.26316	5.55556	-	1.5	1.1	2.5641	3.44828
prM/M	G808A	Glu124Lys	Yes	2	0	5.26316	5.55556	-	1	1	5.12821	0
E	G950C	Gly5Ala	-	2	0	5.26316	5.55556	-	1.7	1	2.5641	3.44828
E	G1039T	Ala35Ser	Yes	2	0	5.26316	5.55556	-	1	6	5.12821	0
E	A1148C	Glu71Ala	-	3	0	5.26316	11.1111	-	15	19-23	5.12821	3.44828
E	A1207G	Ile91Val	-	2	0	0	11	-	-	16-25	3	3
E	G1543A	Asp203Asn	Yes	4	0	5.26316	16.6667	-	5	4-16	5.12821	6.89655
E	C1955T	Thr340Ile	Yes	4	0	5.26316	16.6667	-	16	10-18	5.12821	6.89655
E	T1972C	Tyr346His	Yes	2	0	5.26316	5.55556	-	23	25	5.12821	0
E	T2065A	Tyr377Asn	Yes	2	0	0	11	-	-	0.6-1	5	0
E	A2105G	Asn390Ser	-	2	0	5.26316	5.55556	-	38	19	2.5641	3.44828
E	A2320G	Ile462Val	-	4	0	5.26316	16.6667	-	14	7-10	5.12821	6.89655
E	C2408T	Ala491Val	-	2	0	5.26316	5.55556	-	6	10	0	6.89655
NS1	A2989G	Asn190Asp	Yes	3	0	5.26316	11.1111	-	41	21-34	5.12821	3.44828
NS1	G3057A	Met212Ile	-	4	0	5.26316	16.6667	-	10	7-14	5.12821	6.89655
NS1	T3162A	Phe247Leu	Yes	4	0	5.26316	16.6667	-	6	8-26	5.12821	6.89655
NS1	G3289A	Asp290Asn	Yes	3	0	5.26316	11.1111	-	3	7-11	2.5641	6.89655
NS2A	A3562G	Thr29Ala	Yes	2	0	0	11	-	-	6-10	5	0
NS2A	C3803T	Ala109Val	-	2	0	5.26316	5.55556	-	3	9-15	2.5641	3.44828
NS2B	G4456C	Val109Leu	-	3	0	5.26316	11.1111	-	4	9-15	2.5641	6.89655
NS2B	C4462G	Pro111Ala	Yes	2	0	5.26316	5.55556	-	2	2	2.5641	3.44828
NS2B	C4487T	Ala119Val	-	2	0	5.26316	5.55556	-	13	11	0	6.89655
NS3	G4829A	Gly103Glu	Yes	3	0	10.5263	5.55556	-	1	0.8	7.69231	0
NS3	A5078G	Lys186Arg	-	3	0	0	17	-	-	6-12	5	3
NS3	A5092T	Met191Leu	-	2	0	0	11	-	-	2-3.5	5	0
NS3	A5699T	Glu393Val	Yes	2	0	5.26316	5.55556	-	1	2.5	5.12821	0
NS4B	C6884T	Thr20Ile	Yes	2	0	0	11	-	-	16-20	3	3
NS4B	G6889C	Glu22Gln	Yes	4	0	5.26316	16.6667	-	13	6-15	5.12821	6.89655
NS4B	T6892C	Ser23Pro	-	4	0	5.26316	16.6667	-	14	7-15	5.12821	6.89655
NS4B	G7186A	Val121Ile	-	3	0	5.26316	11.1111	-	24	24-34	5.12821	3.44828
NS5	G7582A	Val5Ile	-	3	0	5.26316	11.1111	-	23	7-41	5.12821	3.44828
NS5	A7777C	Met70Leu	-	4	0	10.5263	11.1111	-	10-38	27-38	5.12821	6.89655
NS5	A8398T	Ile277Phe	Yes	2	0	5.26316	5.55556	-	3.4	2.3	5.12821	0
NS5	A8913T	Glu448Asp	-	2	0	0	11	-	-	2	5	0
NS5	G9071A	Gly501Glu	Yes	3	0	5.26316	11.1111	-	8	10-17	2.5641	6.89655
NS5	T9491C	Ile641Thr	Yes	2	0	5.26316	5.55556	-	11	23	2.5641	3.44828
NS5	A9628G	Val687Ile	-	3	0	10.5263	5.55556	-	1-14	46	5.12821	3.44828
NS5	C9857G	Thr763Ser	-	2	0	0	11	-	-	5-7	3	3
NS5	A10205C	Tyr879Ser	Yes	2	0	5.26316	5.55556	-	2	2	5.12821	0
5UTR	A67T	-	-	2	0	0	11.1111	-	-	2-3	5.12821	0
3UTR	A10369T	-	-	2	0	0	11.1111	-	-	4-14	2.5641	3.44828
3UTR	C10387T	-	-	2	0	0	11.1111	-	-	4-11	2.5641	3.44828
3UTR	10387insAT	-	-	2	0	0	11.1111	-	-	6-17	2.5641	3.44828
3UTR	G10400A	-	-	2	0	0	11.1111	-	-	4-12	2.5641	3.44828
3UTR	C10411T	-	-	2	0	0	11.1111	-	-	4-16	2.5641	3.44828
3UTR	G10413A	-	-	2	0	0	11.1111	-	-	4-17	2.5641	3.44828
3UTR	C10450T	-	-	3	0	0	16.6667	-	-	1-12	5.12821	3.44828
3UTR	C10452T	-	-	3	0	0	16.6667	-	-	1-13	5.12821	3.44828
3UTR	10611insA	-	-	3	0	5.26316	11.1111	-	24	3-12.5	5.12821	3.44828
Subgroup 4 - DF+WS+SD (Increasing/Decreasing inter-host frequency from DF to SD)
C	G341T	Arg82Ile	Yes	18	48.3871	10.5263	5.55556	1-4	1-2	2	33.3333	17.2414
E	T2210A	Leu425*	Yes	16	32.2581	26.3158	5.55556	1-2	1-4	1	28.2051	17.2414
NS2A	G3928C	Ala151Pro	Yes	19	51.6129	10.5263	5.55556	1-2	2	2	35.8974	17.2414
NS3	G5026A	Glu169Lys	Yes	7	16.129	5.26316	5.55556	1	1	7	15.3846	3.44828
NS3	T5304G	Cys261Trp	Yes	11	25.8065	10.5263	5.55556	1-2	1	1	12.8205	20.6897
NS3	G5531T	Arg337Ile	Yes	21	45.1613	21.0526	16.6667	1-4	1-5	1-5	43.5897	13.7931
NS3	C5717T	Ala399Val	-	12	22.5806	21.0526	5.55556	1-3	1-2	2	20.5128	13.7931
NS4A	G6491A	Arg39Lys	-	10	25.8065	5.26316	5.55556	1-16	11	44	17.9487	10.3448
NS4B	G6844A	Glu7Lys	Yes	24	51.6129	31.5789	11.1111	1-3	1-2	1	43.5897	24.1379
NS4B	C6922T	Arg33Cys	Yes	22	45.1613	36.8421	5.55556	1-2	1-3	1	35.8974	27.5862
NS4B	C6982T	Arg53*	Yes	32	70.9677	36.8421	16.6667	1-3	1-2	1-3	56.4103	34.4828
NS4B	C7435G	Leu204Val	-	8	16.129	10.5263	5.55556	0.5-1	1	1	15.3846	6.89655
NS5	G8074C	Glu169Gln	Yes	20	54.8387	10.5263	5.55556	1-3	1-2	1	35.8974	20.6897
NS5	A8932T	Met455Leu	-	13	29.0323	10.5263	11.1111	1-2	1-1.5	1	25.641	10.3448
NS5	G9714C	Glu715Asp	-	15	29.0323	26.3158	5.55556	1-2	1	0.5	23.0769	20.6897
NS5	C9902G	Ala778Gly	-	29	64.5161	36.8421	11.1111	1-4	1-4	2-6	51.2821	31.0345
NS5	A10202G	Glu878Gly	Yes	5	9.67742	5.26316	5.55556	3-26	5	38	10.2564	3.44828
5UTR	G96A	-	-	8	22.5806	5.26316	0	1-2	1	0	17.9487	3.44828
3UTR	10389delA	-	-	13	29.0323	10.5263	11.1111	3-26	8-10	30-39	20.5128	17.2414
3UTR	C10408T	-	-	10	22.5806	5.26316	11.1111	1-18	6	15-32	17.9487	10.3448
3UTR	10444insA	-	-	6	12.9032	5.26316	5.55556	2-4	6	6	10.2564	6.89655
3UTR	10612insA	-	-	5	12.9032	5.26316	0	1-7	4	0	7.69231	6.89655
C	A127T	Thr11Ser	-	6	6.45161	5.26316	16.6667	5-9	7	14-17	5.12821	13.7931
C	C431T	Ala112Val	-	10	9.67742	10.5263	27.7778	1-6	3-10	1-47	12.8205	17.2414
prM/M	G523A	Asp29Asn	Yes	8	6.45161	10.5263	22.2222	1-5	9-35	1-36	10.2564	13.7931
prM/M	C880T	His148Tyr	Yes	6	3.22581	10.5263	16.6667	1	2-14	8-24	5.12821	13.7931
E	C1094T	Pro53Leu	Yes	15	12.9032	10.5263	50	1-10	5-8	1-49	23.0769	20.6897
E	A1214G	Lys93Arg	-	9	6.45161	10.5263	27.7778	6-9	4-21	11-20	12.8205	13.7931
E	G1396A	Asp154Asn	Yes	6	3.22581	5.26316	22.2222	2	32	13-19	7.69231	10.3448
E	A1858G	Ile308Val	-	7	3.22581	10.5263	22.2222	5	5-13	14-41	7.69231	13.7931
E	C1972T	His346Tyr	Yes	9	6.45161	15.7895	22.2222	1-5	6-46	1-45	7.69231	20.6897
E	C2276T	Ala447Val	-	16	6.45161	31.5789	44.4444	2-10	1-40	5-33	23.0769	24.1379
NS1	C2791T	Leu124Phe	Yes	8	3.22581	10.5263	27.7778	2	9-20	6-20	5.12821	20.6897
NS1	A2911T	Thr164Ser	-	12	6.45161	15.7895	38.8889	4-6	13-29	2-38	20.5128	13.7931
NS1	G2989A	Asp190Asn	Yes	9	6.45161	10.5263	27.7778	1-8	2-4	1-41	10.2564	17.2414
NS2A	T3595C	Phe40Leu	Yes	11	6.45161	10.5263	38.8889	3-4	4-21	6-37	15.3846	17.2414
NS2A	C3743T	Ala89Val	-	5	3.22581	5.26316	16.6667	4	12	2-27	10.2564	3.44828
NS2A	G3874A	Val133Ile	-	5	3.22581	5.26316	16.6667	2	2	7-10	5.12821	10.3448
NS2A	C3935T	Ser153Leu	Yes	8	6.45161	10.5263	22.2222	1-2	2-10	1-15	7.69231	17.2414
NS2A	C3998T	Ala174Val	-	8	6.45161	5.26316	27.7778	1-2	12	1-18	10.2564	13.7931
NS2A	T4009A	Ser178Thr	-	6	3.22581	5.26316	22.2222	2	11	8-19	7.69231	10.3448
NS2A	A4034G	Gln186Arg	Yes	16	6.45161	26.3158	50	8-25	1-25	1-46	28.2051	17.2414
NS2A	A4069G	Ile198Val	-	5	3.22581	10.5263	11.1111	23	1-8	7-21	7.69231	6.89655
NS2A	G4121A	Ser215Asn	-	9	3.22581	21.0526	22.2222	3	2-17	7-17	10.2564	17.2414
NS2B	G4249A	Val40Ile	-	13	6.45161	26.3158	33.3333	2-3	8-14	6-26	23.0769	13.7931
NS3	G4604A	Arg28Lys	-	9	3.22581	10.5263	33.3333	4	6-38	1-25	15.3846	10.3448
NS3	A4739G	Lys73Arg	-	5	3.22581	10.5263	11.1111	2	6-24	17-24	5.12821	10.3448
NS3	A6203G	Lys588Arg	-	5	3.22581	10.5263	11.1111	2	3-28	10-12	2.5641	13.7931
NS4A	G6512A	Ser46Asn	-	8	6.45161	10.5263	22.2222	1-12	7-14	2-15	7.69231	17.2414
NS4A	A6652G	Ile93Val	-	5	3.22581	10.5263	11.1111	12	16-35	20-23	7.69231	6.89655
NS4B	C6862T	Leu13Phe	Yes	5	3.22581	5.26316	16.6667	3	22	13-21	5.12821	10.3448
NS4B	T6870G	Phe15Leu	Yes	6	3.22581	5.26316	22.2222	3	27	13-22	7.69231	10.3448
NS4B	G6871A	Gly16Arg	Yes	18	16.129	15.7895	55.5556	2-15	12-20	2-40	33.3333	17.2414
NS4B	G6967A	Val48Ile	-	7	3.22581	10.5263	22.2222	2	2-10	1-16	7.69231	13.7931
NS4B	A7186G	Ile121Val	-	9	6.45161	10.5263	27.7778	1-10	11-17	1-40	7.69231	20.6897
NS5	A8035G	Ile156Val	-	5	3.22581	5.26316	16.6667	1	10	4-13	5.12821	10.3448
NS5	G8204T	Arg212Leu	Yes	7	3.22581	21.0526	11.1111	2	1	1-1.5	12.8205	6.89655
NS5	A8242T	Thr225Ser	-	6	3.22581	5.26316	22.2222	3	5	1-23	7.69231	10.3448
NS5	A8306G	Lys246Arg	-	8	3.22581	10.5263	27.7778	6	5-15	1-25	10.2564	13.7931
NS5	G8572A	Val335Ile	-	6	3.22581	10.5263	16.6667	2	3-35	21-24	5.12821	13.7931
NS5	A9725T	Lys719Ile	Yes	5	3.22581	10.5263	11.1111	7	13-23	14-17	7.69231	6.89655
NS5	A10071T	Glu834Asp	-	5	3.22581	5.26316	16.6667	6	11	18-28	10.2564	3.44828
NS5	G10075A	Val836Ile	-	8	6.45161	5.26316	27.7778	1-9	19	2-31	10.2564	13.7931
3UTR	10389insA	-	-	18	16.129	21.0526	50	1-21	1-20	1-36	25.641	27.5862
3UTR	10443insA	-	-	11	3.22581	21.0526	33.3333	0.6	2-4	2-3	17.9487	13.7931
3UTR	C10389T	-	-	6	6	5	17	1-17	17	4-18	10	7

## Sheet: Fig S6
Supplementary Figure 6 - Natural selection (dN/dS) assessment for samples grouped by patient immune response (A) and patient days of symptoms (B). dN (C) and dS (D) analysed separetaly for samples grouped by clinical classification. Also, dN/dS ratio was computed for individual genes of the polyprotein within each sample and plotted for samples grouped by clinical classification, immune response …
A)					B)					C)
Mann-Whitney test for dN/dS vs immune response					Kruskal-Wallis test for dN/dS vs Days of symptoms					Kruskal-Wallis test for dN vs clinical classification; p=0.0478
P>0.05					P>0.05					Mann-Whitney test DFvsWS; p>0.05
										Mann-Whitney test DFvsSD; p=0.0048
										Mann-Whitney test WSvsSD; p>0.05
D)						E)
Kruskal-Wallis test for dS vs clinical classification; p=0.0001
Mann-Whitney test DFvsWS; p>0.05
Mann-Whitney test DFvsSD; p<0.0001
Mann-Whitney test WSvsSD; p=0.0172
						Kruskal-Wallis test. dN/dS medians comparison, DF clinical category; p=0.0005
						Kruskal-Wallis test. dN/dS medians comparison, WS clinical category; p=0.0051
						Kruskal-Wallis test. dN/dS medians comparison, SD clinical category; p=0.0001
						(*) Mann-Whitney test, NS2A gene -> DFvsWS p=0.0346; DFvsSD p=0.0134
						Kruskal-Wallis test. dN/dS medians comparison, P immune response category; p<0.0001
						Kruskal-Wallis test. dN/dS medians comparison, S immune response category; p=0.0043
						Kruskal-Wallis test. dN/dS medians comparison, 0-1 days of symptoms; p=0.0337
						Kruskal-Wallis test. dN/dS medians comparison, 2-3 days of symptoms; p<0.0001
						Kruskal-Wallis test. dN/dS medians comparison, 4-5 days of symptoms; p=0.0267
						Kruskal-Wallis test. dN/dS medians comparison, >6 days of symptoms; p=0.0331

## Sheet:  Appendix S7
Supplementary Appendix 7 - Immune response classification according to Miagostovich et al, 1999
	Days from the onset of symptoms Days from the onset of symptoms
	≤ 5 days	6-9 days	≥ 10 days	Immune response
IgG titer	< 160	< 10240	< 40960	Primary
	≥ 160	≥ 10240	≥ 40960	Secondary
Sample	IgG titer#	DofS	Immune response
137	2560	9	Primary
138	< 40	2	Primary
139	< 40	5	Primary
140	10240	10	Primary
141	160	5	Secondary
142	< 40	5	Primary
143	40960	ND	Secondary*
144	< 40	ND	Primary*
145	640	3	Secondary
146	160	2	Secondary
147	160	2	Secondary
148	640	1	Secondary
149	40	5	Primary
151	160	2	Secondary
153	2560	12	Primary
154	160	2	Secondary
155	640	2	Secondary
156	< 40	3	Primary
157	2560	3	Secondary
158	160	1	Secondary
159	160	3	Secondary
160	160	0	Secondary
161	40	3	Primary
162	40	2	Primary
163	640	2	Secondary
166	<40	1	Primary
167	<40	3	Primary
168	160	2	Secondary
169	<40	2	Primary
170	40	1	Primary
171	40	1	Primary
172	40	2	Primary
173	640	4	Secondary
174	40	3	Primary
175	160	1	Secondary
177	<40	4	Primary
178	<40	4	Primary
179	<40	0	Primary
180	<40	2	Primary
181	640	2	Secondary
182	<40	2	Primary
183	40	1	Primary
184	<40	0	Primary
185	640	2	Secondary
186	40	3	Primary
187	160	3	Secondary
188	<40	2	Primary
189	<40	1	Primary
190	640	2	Secondary
191	640	0	Secondary
192	640	2	Secondary
193	40	3	Primary
194	<40	4	Primary
195	40	4	Primary
196	40	5	Primary
197	2560	7	Primary
198	<40	6	Primary
199	40960	7	Secondary
200	40960	4	Secondary
201	2560	4	Secondary
202	40	ND	Primary*
203	<40	5	Primary
204	640	8	Primary
205	160	1	Secondary
206	2560	5	Secondary
207	640	5	Secondary
208	10240	24	Primary
209	2560	6	Primary
DofS: days since the onset of symptoms; ND: not determined
#Determined by an in-house ELISA assay.
*Even though cases 143, 144 and 202 lack the information of patient days of symptoms, immune response could be anyway determined because IgG titer resulted as low or high as needed, respectively, to classify the immune response independently to the days of symptoms. This peculiarity allowed theses cases to be included in the study.

## Sheet: Appendix S8 
Supplementary Appendix 8 - GenBank accesion numbers of the DENV-2 sequences employed in the phylogenetic analysis.
AF208496	EU482608	EU920828	FJ024475	FJ850107	GQ199895	GU131902	HQ332190	JN819424	JX669486	KC294221	KU509274	KY474328	MH781015
AB122022	EU482723	EU920829	FJ024477	FJ850108	GQ199898	GU131947	HQ541786	JX286516	JX669487	KC294222	KX452046	KY474329	MH822951
AY702035	EU482725	EU920830	FJ182012	FJ850112	GQ868540	GU131955	HQ541787	JX286518	JX669488	KC294223	KX702403	KY474330	MH823208
AY702036	EU482726	EU920831	FJ639705	FJ850119	GQ868549	GU131959	HQ541788	JX286519	KC294200	KF955360	KX702404	KY474331	MH888331
AY702037	EU482731	EU920832	FJ639732	FJ850120	GQ868551	GU131974	HQ541792	JX286520	KC294201	KF955385	KY415992	KY474332	MK268692
AY702038	EU482734	EU920833	FJ639733	FJ873808	GQ868552	GU131975	HQ541793	JX286521	KC294202	KF955395	KY474308	KY474333	MK411559
AY702039	EU482735	EU920834	FJ639734	FJ898438	GQ868553	GU369819	HQ541794	JX286522	KC294203	KJ189305	KY474309	KY474334	MK517773
DQ181804	EU482755	EU920835	FJ639783	FJ898439	GQ868554	HM181971	HQ541798	JX286523	KC294204	KJ189308	KY474312	KY627762	MN239505
DQ181805	EU569708	EU920836	FJ639788	FJ898450	GQ868555	HM582117	HQ705624	JX286524	KC294205	KJ189309	KY474313	KY921904	MN272404
EU056811	EU596488	EU920837	FJ639809	FJ898451	GQ868556	HM631865	HQ733861	JX286525	KC294206	KJ189310	KY474314	KY921905	MN272405
EU482444	EU596490	EU920838	FJ639822	FJ898452	GQ868557	HQ012533	HQ999999	JX286526	KC294207	KJ189311	KY474315	LC436674	MN959474
EU482544	EU596491	EU920840	FJ850050	FJ898453	GQ868558	HQ012534	JF327392	JX567950	KC294208	KJ189370	KY474316	MF459663	MN959475
EU482545	EU677142	EU920841	FJ850060	FJ898460	GQ868596	HQ012535	JF357906	JX567951	KC294209	KP188549	KY474317	MH069495	MN959476
EU482548	EU677145	EU920842	FJ850072	FJ898461	GQ868603	HQ012536	JF730051	JX669476	KC294210	KP188550	KY474318	MH069496	MN959477
EU482550	EU687212	EU920843	FJ850074	FJ898465	GQ868604	HQ012537	JF730053	JX669477	KC294211	KP188551	KY474319	MH069497	MN959478
EU482556	EU687216	EU920844	FJ850076	FJ898466	GQ868640	HQ012538	JF730054	JX669478	KC294212	KP188552	KY474320	MH069498	MN959479
EU482560	EU687217	EU920845	FJ850078	FJ898467	GQ868641	HQ026763	JN819404	JX669479	KC294213	KP188553	KY474321	MH069499	MN959480
EU482601	EU687220	EU920846	FJ850082	FJ898478	GU131864	HQ332184	JN819407	JX669480	KC294214	KP188554	KY474322	MH215277	MN959481
EU482603	EU687230	EU920847	FJ850085	FJ906959	GU131881	HQ332185	JN819408	JX669481	KC294216	KP188555	KY474323	MH613984	MT076937
EU482604	EU687241	EU920848	FJ850088	GQ199890	GU131882	HQ332186	JN819416	JX669482	KC294217	KP188556	KY474324	MH613985	MT897896
EU482605	EU687245	EU920849	FJ850091	GQ199892	GU131883	HQ332187	JN819419	JX669483	KC294218	KP188569	KY474325	MH613986	MT899084
EU482606	EU726775	FJ024473	FJ850105	GQ199893	GU131884	HQ332188	JN819421	JX669484	KC294219	KU509267	KY474326	MH781013	MT899085
EU482607	EU854294	FJ024474	FJ850106	GQ199894	GU131885	HQ332189	JN819422	JX669485	KC294220	KU509273	KY474327	MH781014
